# Supplementary material for: Dismantling Barriers to Hepatitis B and Delta Screening, Prevention, and Linkage to Care among the PWUD Community in Philadelphia
Source: MDPI journal article supplement (doi:10.3390/v16040628), 2024-04-18
Supplement: s1 [file s1]

Supplementary File S1: Participant Demographic Questions

|                                |                                                                              |
|--------------------------------|------------------------------------------------------------------------------|
| <b>PARTICIPANT INFORMATION</b> | <b>Participant Consent Date:</b> _____<br><b>Participant Study ID:</b> _____ |
|--------------------------------|------------------------------------------------------------------------------|

**PRIMARY LANGUAGE:** ☐ English ☐ Spanish

**DATE OF BIRTH:** \_\_\_\_/\_\_\_\_/\_\_\_\_

**PLACE OF BIRTH:** ☐ USA ☐ Other: \_\_\_\_\_

**RACE:** ☐ Black ☐ White ☐ Asian – Country of Origin : \_\_\_\_\_ ☐ African ☐ Pacific Islander ☐ Native American ☐ Other \_\_\_\_\_

**HISPANIC** ☐ Yes ☐ No ☐ Unk

**GENDER:** ☐ Female ☐ Male ☐ Transgender ☐ FTM ☐ MTF

**WHAT SERVICES ARE YOU SEEKING AT PPP:** ☐ Exchange ☐ Drug Treatment ☐ HIV/HCV Testing ☐ Counselor ☐ Medical Care ☐ None (here to hang out/rest) ☐ Other \_\_\_\_\_

### TESTING HISTORY

**Have you ever tested positive for:**

Hepatitis A Virus (HAV) ☐ Yes ☐ No ☐ Unk If yes, when? \_\_\_\_\_  
 Hepatitis B Virus (HBV) ☐ Yes ☐ No ☐ Unk If yes, when? \_\_\_\_\_  
 Hepatitis C Virus (HCV) ☐ Yes ☐ No ☐ Unk If yes, when? \_\_\_\_\_  
 Hepatitis D Virus (HDV) ☐ Yes ☐ No ☐ Unk If yes, when? \_\_\_\_\_

**Have you ever been vaccinated for:**

HAV ☐ Yes ☐ No ☐ Unk If yes, when? \_\_\_\_\_  
 HBV ☐ Yes ☐ No ☐ Unk If yes, when? \_\_\_\_\_

### CLINICAL & RISK FACTORS

| <table style="width: 100%;"> <tr> <th style="text-align: left;">Have you ever:</th> <th style="text-align: center;"><u>Yes</u></th> <th style="text-align: center;"><u>No</u></th> <th style="text-align: center;"><u>Unk</u></th> </tr> <tr> <td>Been incarcerated?</td> <td style="text-align: center;"><input type="checkbox"/></td> <td style="text-align: center;"><input type="checkbox"/></td> <td style="text-align: center;"><input type="checkbox"/></td> </tr> <tr> <td>  If yes, in the last 6 months?</td> <td style="text-align: center;"><input type="checkbox"/></td> <td style="text-align: center;"><input type="checkbox"/></td> <td style="text-align: center;"><input type="checkbox"/></td> </tr> <tr> <td>Gotten a tattoo?</td> <td style="text-align: center;"><input type="checkbox"/></td> <td style="text-align: center;"><input type="checkbox"/></td> <td style="text-align: center;"><input type="checkbox"/></td> </tr> <tr> <td>  If yes, where: <input type="checkbox"/> Tattoo parlor/shop <input type="checkbox"/> Tattoo party</td> <td></td> <td></td> <td></td> </tr> <tr> <td>    <input type="checkbox"/> Jail/Prison <input type="checkbox"/> Friend/Relative <input type="checkbox"/> Other _____</td> <td></td> <td></td> <td></td> </tr> <tr> <td>Injected drugs?</td> <td style="text-align: center;"><input type="checkbox"/></td> <td style="text-align: center;"><input type="checkbox"/></td> <td style="text-align: center;"><input type="checkbox"/></td> </tr> <tr> <td>  If yes, in the last 6 months?</td> <td></td> <td></td> <td></td> </tr> <tr> <td>  If yes, shared needles/works?</td> <td></td> <td></td> <td></td> </tr> <tr> <td>Had unprotected sex?</td> <td style="text-align: center;"><input type="checkbox"/></td> <td style="text-align: center;"><input type="checkbox"/></td> <td style="text-align: center;"><input type="checkbox"/></td> </tr> <tr> <td>  If yes, in the last 6 months?</td> <td style="text-align: center;"><input type="checkbox"/></td> <td style="text-align: center;"><input type="checkbox"/></td> <td style="text-align: center;"><input type="checkbox"/></td> </tr> <tr> <td>Had sex for money or drugs?</td> <td style="text-align: center;"><input type="checkbox"/></td> <td style="text-align: center;"><input type="checkbox"/></td> <td style="text-align: center;"><input type="checkbox"/></td> </tr> <tr> <td></td> <td style="text-align: center;"><input type="checkbox"/></td> <td style="text-align: center;"><input type="checkbox"/></td> <td style="text-align: center;"><input type="checkbox"/></td> </tr> </table> | Have you ever:           | <u>Yes</u>               | <u>No</u>                | <u>Unk</u> | Been incarcerated? | <input type="checkbox"/> | <input type="checkbox"/> | <input type="checkbox"/> | If yes, in the last 6 months? | <input type="checkbox"/> | <input type="checkbox"/> | <input type="checkbox"/> | Gotten a tattoo? | <input type="checkbox"/> | <input type="checkbox"/> | <input type="checkbox"/> | If yes, where: <input type="checkbox"/> Tattoo parlor/shop <input type="checkbox"/> Tattoo party |  |  |  | <input type="checkbox"/> Jail/Prison <input type="checkbox"/> Friend/Relative <input type="checkbox"/> Other _____ |  |  |  | Injected drugs? | <input type="checkbox"/> | <input type="checkbox"/> | <input type="checkbox"/> | If yes, in the last 6 months? |  |  |  | If yes, shared needles/works? |  |  |  | Had unprotected sex? | <input type="checkbox"/> | <input type="checkbox"/> | <input type="checkbox"/> | If yes, in the last 6 months? | <input type="checkbox"/> | <input type="checkbox"/> | <input type="checkbox"/> | Had sex for money or drugs? | <input type="checkbox"/> | <input type="checkbox"/> | <input type="checkbox"/> |  | <input type="checkbox"/> | <input type="checkbox"/> | <input type="checkbox"/> | <p>How old were you when you started injecting? _____<br/> <input type="checkbox"/> I don't inject drugs</p> <p>What is your preferred method of drug consumption?<br/> <input type="checkbox"/> Injection <input type="checkbox"/> Smoke <input type="checkbox"/> Oral <input type="checkbox"/> Sniff<br/> <input type="checkbox"/> Other _____ <input type="checkbox"/> I don't consume drugs</p> <p>Have your sexual partners in your lifetime been:<br/> <input type="checkbox"/> Male <input type="checkbox"/> Female <input type="checkbox"/> Both</p> <p>Are you currently homeless, living on the streets, or living in a shelter? <input type="checkbox"/> Yes <input type="checkbox"/> No <input type="checkbox"/> Unknown</p> <p><b>Notes:</b> _____<br/>       _____<br/>       _____<br/>       _____<br/>       _____</p> |
|-------------------------------------------------------------------------------------------------------------------------------------------------------------------------------------------------------------------------------------------------------------------------------------------------------------------------------------------------------------------------------------------------------------------------------------------------------------------------------------------------------------------------------------------------------------------------------------------------------------------------------------------------------------------------------------------------------------------------------------------------------------------------------------------------------------------------------------------------------------------------------------------------------------------------------------------------------------------------------------------------------------------------------------------------------------------------------------------------------------------------------------------------------------------------------------------------------------------------------------------------------------------------------------------------------------------------------------------------------------------------------------------------------------------------------------------------------------------------------------------------------------------------------------------------------------------------------------------------------------------------------------------------------------------------------------------------------------------------------------------------------------------------------------------------------------------------------------------------------------------------------------------------------------------------------------------------------------------------------------------------------------------------------------------------------------------------------------------------------------------------------------------------------------------------------------------------------------------------------------------------------------------------------------------------------------------------------------------------------------------------------------------------------------------------------------------------------------------------------------------------------------------------------------------------------------------------------------------------------------------------------------------|--------------------------|--------------------------|--------------------------|------------|--------------------|--------------------------|--------------------------|--------------------------|-------------------------------|--------------------------|--------------------------|--------------------------|------------------|--------------------------|--------------------------|--------------------------|--------------------------------------------------------------------------------------------------|--|--|--|--------------------------------------------------------------------------------------------------------------------|--|--|--|-----------------|--------------------------|--------------------------|--------------------------|-------------------------------|--|--|--|-------------------------------|--|--|--|----------------------|--------------------------|--------------------------|--------------------------|-------------------------------|--------------------------|--------------------------|--------------------------|-----------------------------|--------------------------|--------------------------|--------------------------|--|--------------------------|--------------------------|--------------------------|-----------------------------------------------------------------------------------------------------------------------------------------------------------------------------------------------------------------------------------------------------------------------------------------------------------------------------------------------------------------------------------------------------------------------------------------------------------------------------------------------------------------------------------------------------------------------------------------------------------------------------------------------------------------------------------------------------------------------------------------------------------------------------------------------------------------------------------------|
| Have you ever:                                                                                                                                                                                                                                                                                                                                                                                                                                                                                                                                                                                                                                                                                                                                                                                                                                                                                                                                                                                                                                                                                                                                                                                                                                                                                                                                                                                                                                                                                                                                                                                                                                                                                                                                                                                                                                                                                                                                                                                                                                                                                                                                                                                                                                                                                                                                                                                                                                                                                                                                                                                                                            | <u>Yes</u>               | <u>No</u>                | <u>Unk</u>               |            |                    |                          |                          |                          |                               |                          |                          |                          |                  |                          |                          |                          |                                                                                                  |  |  |  |                                                                                                                    |  |  |  |                 |                          |                          |                          |                               |  |  |  |                               |  |  |  |                      |                          |                          |                          |                               |                          |                          |                          |                             |                          |                          |                          |  |                          |                          |                          |                                                                                                                                                                                                                                                                                                                                                                                                                                                                                                                                                                                                                                                                                                                                                                                                                                         |
| Been incarcerated?                                                                                                                                                                                                                                                                                                                                                                                                                                                                                                                                                                                                                                                                                                                                                                                                                                                                                                                                                                                                                                                                                                                                                                                                                                                                                                                                                                                                                                                                                                                                                                                                                                                                                                                                                                                                                                                                                                                                                                                                                                                                                                                                                                                                                                                                                                                                                                                                                                                                                                                                                                                                                        | <input type="checkbox"/> | <input type="checkbox"/> | <input type="checkbox"/> |            |                    |                          |                          |                          |                               |                          |                          |                          |                  |                          |                          |                          |                                                                                                  |  |  |  |                                                                                                                    |  |  |  |                 |                          |                          |                          |                               |  |  |  |                               |  |  |  |                      |                          |                          |                          |                               |                          |                          |                          |                             |                          |                          |                          |  |                          |                          |                          |                                                                                                                                                                                                                                                                                                                                                                                                                                                                                                                                                                                                                                                                                                                                                                                                                                         |
| If yes, in the last 6 months?                                                                                                                                                                                                                                                                                                                                                                                                                                                                                                                                                                                                                                                                                                                                                                                                                                                                                                                                                                                                                                                                                                                                                                                                                                                                                                                                                                                                                                                                                                                                                                                                                                                                                                                                                                                                                                                                                                                                                                                                                                                                                                                                                                                                                                                                                                                                                                                                                                                                                                                                                                                                             | <input type="checkbox"/> | <input type="checkbox"/> | <input type="checkbox"/> |            |                    |                          |                          |                          |                               |                          |                          |                          |                  |                          |                          |                          |                                                                                                  |  |  |  |                                                                                                                    |  |  |  |                 |                          |                          |                          |                               |  |  |  |                               |  |  |  |                      |                          |                          |                          |                               |                          |                          |                          |                             |                          |                          |                          |  |                          |                          |                          |                                                                                                                                                                                                                                                                                                                                                                                                                                                                                                                                                                                                                                                                                                                                                                                                                                         |
| Gotten a tattoo?                                                                                                                                                                                                                                                                                                                                                                                                                                                                                                                                                                                                                                                                                                                                                                                                                                                                                                                                                                                                                                                                                                                                                                                                                                                                                                                                                                                                                                                                                                                                                                                                                                                                                                                                                                                                                                                                                                                                                                                                                                                                                                                                                                                                                                                                                                                                                                                                                                                                                                                                                                                                                          | <input type="checkbox"/> | <input type="checkbox"/> | <input type="checkbox"/> |            |                    |                          |                          |                          |                               |                          |                          |                          |                  |                          |                          |                          |                                                                                                  |  |  |  |                                                                                                                    |  |  |  |                 |                          |                          |                          |                               |  |  |  |                               |  |  |  |                      |                          |                          |                          |                               |                          |                          |                          |                             |                          |                          |                          |  |                          |                          |                          |                                                                                                                                                                                                                                                                                                                                                                                                                                                                                                                                                                                                                                                                                                                                                                                                                                         |
| If yes, where: <input type="checkbox"/> Tattoo parlor/shop <input type="checkbox"/> Tattoo party                                                                                                                                                                                                                                                                                                                                                                                                                                                                                                                                                                                                                                                                                                                                                                                                                                                                                                                                                                                                                                                                                                                                                                                                                                                                                                                                                                                                                                                                                                                                                                                                                                                                                                                                                                                                                                                                                                                                                                                                                                                                                                                                                                                                                                                                                                                                                                                                                                                                                                                                          |                          |                          |                          |            |                    |                          |                          |                          |                               |                          |                          |                          |                  |                          |                          |                          |                                                                                                  |  |  |  |                                                                                                                    |  |  |  |                 |                          |                          |                          |                               |  |  |  |                               |  |  |  |                      |                          |                          |                          |                               |                          |                          |                          |                             |                          |                          |                          |  |                          |                          |                          |                                                                                                                                                                                                                                                                                                                                                                                                                                                                                                                                                                                                                                                                                                                                                                                                                                         |
| <input type="checkbox"/> Jail/Prison <input type="checkbox"/> Friend/Relative <input type="checkbox"/> Other _____                                                                                                                                                                                                                                                                                                                                                                                                                                                                                                                                                                                                                                                                                                                                                                                                                                                                                                                                                                                                                                                                                                                                                                                                                                                                                                                                                                                                                                                                                                                                                                                                                                                                                                                                                                                                                                                                                                                                                                                                                                                                                                                                                                                                                                                                                                                                                                                                                                                                                                                        |                          |                          |                          |            |                    |                          |                          |                          |                               |                          |                          |                          |                  |                          |                          |                          |                                                                                                  |  |  |  |                                                                                                                    |  |  |  |                 |                          |                          |                          |                               |  |  |  |                               |  |  |  |                      |                          |                          |                          |                               |                          |                          |                          |                             |                          |                          |                          |  |                          |                          |                          |                                                                                                                                                                                                                                                                                                                                                                                                                                                                                                                                                                                                                                                                                                                                                                                                                                         |
| Injected drugs?                                                                                                                                                                                                                                                                                                                                                                                                                                                                                                                                                                                                                                                                                                                                                                                                                                                                                                                                                                                                                                                                                                                                                                                                                                                                                                                                                                                                                                                                                                                                                                                                                                                                                                                                                                                                                                                                                                                                                                                                                                                                                                                                                                                                                                                                                                                                                                                                                                                                                                                                                                                                                           | <input type="checkbox"/> | <input type="checkbox"/> | <input type="checkbox"/> |            |                    |                          |                          |                          |                               |                          |                          |                          |                  |                          |                          |                          |                                                                                                  |  |  |  |                                                                                                                    |  |  |  |                 |                          |                          |                          |                               |  |  |  |                               |  |  |  |                      |                          |                          |                          |                               |                          |                          |                          |                             |                          |                          |                          |  |                          |                          |                          |                                                                                                                                                                                                                                                                                                                                                                                                                                                                                                                                                                                                                                                                                                                                                                                                                                         |
| If yes, in the last 6 months?                                                                                                                                                                                                                                                                                                                                                                                                                                                                                                                                                                                                                                                                                                                                                                                                                                                                                                                                                                                                                                                                                                                                                                                                                                                                                                                                                                                                                                                                                                                                                                                                                                                                                                                                                                                                                                                                                                                                                                                                                                                                                                                                                                                                                                                                                                                                                                                                                                                                                                                                                                                                             |                          |                          |                          |            |                    |                          |                          |                          |                               |                          |                          |                          |                  |                          |                          |                          |                                                                                                  |  |  |  |                                                                                                                    |  |  |  |                 |                          |                          |                          |                               |  |  |  |                               |  |  |  |                      |                          |                          |                          |                               |                          |                          |                          |                             |                          |                          |                          |  |                          |                          |                          |                                                                                                                                                                                                                                                                                                                                                                                                                                                                                                                                                                                                                                                                                                                                                                                                                                         |
| If yes, shared needles/works?                                                                                                                                                                                                                                                                                                                                                                                                                                                                                                                                                                                                                                                                                                                                                                                                                                                                                                                                                                                                                                                                                                                                                                                                                                                                                                                                                                                                                                                                                                                                                                                                                                                                                                                                                                                                                                                                                                                                                                                                                                                                                                                                                                                                                                                                                                                                                                                                                                                                                                                                                                                                             |                          |                          |                          |            |                    |                          |                          |                          |                               |                          |                          |                          |                  |                          |                          |                          |                                                                                                  |  |  |  |                                                                                                                    |  |  |  |                 |                          |                          |                          |                               |  |  |  |                               |  |  |  |                      |                          |                          |                          |                               |                          |                          |                          |                             |                          |                          |                          |  |                          |                          |                          |                                                                                                                                                                                                                                                                                                                                                                                                                                                                                                                                                                                                                                                                                                                                                                                                                                         |
| Had unprotected sex?                                                                                                                                                                                                                                                                                                                                                                                                                                                                                                                                                                                                                                                                                                                                                                                                                                                                                                                                                                                                                                                                                                                                                                                                                                                                                                                                                                                                                                                                                                                                                                                                                                                                                                                                                                                                                                                                                                                                                                                                                                                                                                                                                                                                                                                                                                                                                                                                                                                                                                                                                                                                                      | <input type="checkbox"/> | <input type="checkbox"/> | <input type="checkbox"/> |            |                    |                          |                          |                          |                               |                          |                          |                          |                  |                          |                          |                          |                                                                                                  |  |  |  |                                                                                                                    |  |  |  |                 |                          |                          |                          |                               |  |  |  |                               |  |  |  |                      |                          |                          |                          |                               |                          |                          |                          |                             |                          |                          |                          |  |                          |                          |                          |                                                                                                                                                                                                                                                                                                                                                                                                                                                                                                                                                                                                                                                                                                                                                                                                                                         |
| If yes, in the last 6 months?                                                                                                                                                                                                                                                                                                                                                                                                                                                                                                                                                                                                                                                                                                                                                                                                                                                                                                                                                                                                                                                                                                                                                                                                                                                                                                                                                                                                                                                                                                                                                                                                                                                                                                                                                                                                                                                                                                                                                                                                                                                                                                                                                                                                                                                                                                                                                                                                                                                                                                                                                                                                             | <input type="checkbox"/> | <input type="checkbox"/> | <input type="checkbox"/> |            |                    |                          |                          |                          |                               |                          |                          |                          |                  |                          |                          |                          |                                                                                                  |  |  |  |                                                                                                                    |  |  |  |                 |                          |                          |                          |                               |  |  |  |                               |  |  |  |                      |                          |                          |                          |                               |                          |                          |                          |                             |                          |                          |                          |  |                          |                          |                          |                                                                                                                                                                                                                                                                                                                                                                                                                                                                                                                                                                                                                                                                                                                                                                                                                                         |
| Had sex for money or drugs?                                                                                                                                                                                                                                                                                                                                                                                                                                                                                                                                                                                                                                                                                                                                                                                                                                                                                                                                                                                                                                                                                                                                                                                                                                                                                                                                                                                                                                                                                                                                                                                                                                                                                                                                                                                                                                                                                                                                                                                                                                                                                                                                                                                                                                                                                                                                                                                                                                                                                                                                                                                                               | <input type="checkbox"/> | <input type="checkbox"/> | <input type="checkbox"/> |            |                    |                          |                          |                          |                               |                          |                          |                          |                  |                          |                          |                          |                                                                                                  |  |  |  |                                                                                                                    |  |  |  |                 |                          |                          |                          |                               |  |  |  |                               |  |  |  |                      |                          |                          |                          |                               |                          |                          |                          |                             |                          |                          |                          |  |                          |                          |                          |                                                                                                                                                                                                                                                                                                                                                                                                                                                                                                                                                                                                                                                                                                                                                                                                                                         |
|                                                                                                                                                                                                                                                                                                                                                                                                                                                                                                                                                                                                                                                                                                                                                                                                                                                                                                                                                                                                                                                                                                                                                                                                                                                                                                                                                                                                                                                                                                                                                                                                                                                                                                                                                                                                                                                                                                                                                                                                                                                                                                                                                                                                                                                                                                                                                                                                                                                                                                                                                                                                                                           | <input type="checkbox"/> | <input type="checkbox"/> | <input type="checkbox"/> |            |                    |                          |                          |                          |                               |                          |                          |                          |                  |                          |                          |                          |                                                                                                  |  |  |  |                                                                                                                    |  |  |  |                 |                          |                          |                          |                               |  |  |  |                               |  |  |  |                      |                          |                          |                          |                               |                          |                          |                          |                             |                          |                          |                          |  |                          |                          |                          |                                                                                                                                                                                                                                                                                                                                                                                                                                                                                                                                                                                                                                                                                                                                                                                                                                         |

**Table S1.** Self-reported previous viral hepatitis A, B, C and D positive test results and association with active hepatitis B and delta infection

| Category               | HBsAg +  |     | HBsAg -  |      | Total    |      | p-value | OR   |
|------------------------|----------|-----|----------|------|----------|------|---------|------|
|                        | <i>n</i> | %   | <i>n</i> | %    | <i>n</i> | %    |         |      |
| HepA Previous Positive |          |     |          |      |          |      | 1       | -    |
| Yes                    | 0        | -   | 17       | 3.5  | 17       | 3.4  |         |      |
| No                     | 10       | 100 | 451      | 92.4 | 461      | 92.6 |         |      |
| Unkown                 | 0        |     | 20       | 4.1  | 20       | 4.0  |         |      |
| HepA Vaccine           |          |     |          |      |          |      | 1       | 0.87 |
| Yes                    | 2        | 20  | 109      | 22.3 | 111      | 22.3 |         |      |
| No                     | 5        | 50  | 235      | 48.2 | 240      | 48.2 |         |      |
| Unknown                | 3        | 30  | 144      | 29.5 | 147      | 29.5 |         |      |
| HepB Previous Positive |          |     |          |      |          |      | 1       | -    |
| Yes                    | 0        | -   | 17       | 3.5  | 17       | 3.4  |         |      |
| No                     | 10       | 100 | 447      | 91.6 | 457      | 91.8 |         |      |
| Unknown                | 0        | -   | 24       | 4.9  | 24       | 4.8  |         |      |
| HepB Vaccine           |          |     |          |      |          |      | .843    | -    |
| Yes                    | 2        | 20  | 107      | 21.9 | 109      | 21.9 |         |      |
| No                     | 4        | 40  | 238      | 48.8 | 242      | 48.6 |         |      |
| Unknown                | 4        | 40  | 143      | 29.3 | 147      | 29.5 |         |      |
| HepC Previous Positive |          |     |          |      |          |      | 1       | 1.13 |
| Yes                    | 5        | 50  | 222      | 45.5 | 227      | 45.6 |         |      |
| No                     | 5        | 50  | 251      | 51.4 | 256      | 51.4 |         |      |
| Unkown                 | 0        | -   | 15       | 3.1  | 15       | 3.0  |         |      |
| HepD Previous Positive |          |     |          |      |          |      | 0.018   | 57.2 |
| Positive               | 1        | 10  | 0        | -    | 1        | 0.2  |         |      |
| Negative               | 8        | 80  | 488      | 100  | 496      | 99.6 |         |      |
| Unknown                | 1        | 10  | 0        | -    | 1        | 0.2  |         |      |

**Table S2.** Self-reported setting of receiving a tattoo and association with active hepatitis B infection

| Category | HBsAg+   |   | HBsAg -  |   | Total    |   | p-value | OR |
|----------|----------|---|----------|---|----------|---|---------|----|
|          | <i>n</i> | % | <i>n</i> | % | <i>n</i> | % |         |    |

|               |   |     |     |      |     |      |      |      |
|---------------|---|-----|-----|------|-----|------|------|------|
| Shop          |   |     |     |      |     |      | 0.69 | 0.68 |
| Yes           | 5 | 0.6 | 281 | 70.8 | 286 | 70.6 |      |      |
| No            | 3 | 0.4 | 116 | 29.2 | 119 | 29.4 |      |      |
| Party         |   |     |     | -    |     |      | 1    | 0    |
| Yes           | 0 | -   | 41  | 10.3 | 41  | 10.1 |      |      |
| No            | 8 | 100 | 356 | 89.7 | 364 | 89.9 |      |      |
| Jail          |   |     |     |      |     |      | 0.68 | 0.41 |
| Yes           | 1 | 0.1 | 102 | 25.7 | 103 | 25.4 |      |      |
| No            | 7 | 0.9 | 295 | 74.3 | 302 | 74.6 |      |      |
| Friend/Family |   |     |     |      |     |      | 0.71 | 1.6  |
| Yes           | 4 | 50  | 155 | 39   | 159 | 39.3 |      |      |
| No            | 4 | 50  | 242 | 61   | 246 | 60.7 |      |      |
| Other         |   |     |     |      |     |      | 1    | 0    |
| Yes           | 0 | -   | 19  | 4.8  | 19  | 4.7  |      |      |
| No            | 8 | 100 | 378 | 95.2 | 386 | 95.3 |      |      |

Note: OR & p-values reported based on those that have tattoos (n = 405).

**Table S3.** Self-reported risk factor variables and odds ratios for the study sample, and association with HBcAb

| Category          | HBcAb+ † |      | HBcAb- |      | Total |      | P-value | OR |
|-------------------|----------|------|--------|------|-------|------|---------|----|
|                   | n        | %    | n      | %    | n     | %    |         |    |
| Unhoused*         |          |      |        |      |       |      |         |    |
| Yes               | 65       | 61.3 | 287    | 73.2 | 352   | 70.7 | 0.04    | -  |
| No                | 40       | 37.7 | 103    | 26.3 | 143   | 28.7 |         |    |
| Unreported        | 1        | 0.9  | 2      | 0.5  | 3     | 0.6  |         |    |
| Transactional sex |          |      |        |      |       |      |         |    |
| Yes               | 41       | 38.7 | 107    | 27.3 | 148   | 29.7 | 0.08    | -  |
| No                | 65       | 61.3 | 278    | 70.9 | 343   | 68.9 |         |    |
| Unreported        | 0        | -    | 7      | 1.8  | 7     | 1.4  |         |    |

† Includes six individuals who also tested positive for HBsAg

\*Indicates significance
